# Supplementary material for: Reconceptualizing Moral Disengagement as a Process: Transcending Overly Liberal and Overly Conservative Practice in the Field
Source: Springer Nature journal article supplement (doi:10.1007/s10551-020-04520-6), 2020-04-28
Supplement: MOESM1 [file 17938640]

## SUPPLEMENTARY MATERIAL

We analyzed the organizational literature on moral disengagement, reviewing the sample of the business ethics literature selected by Newman et al. (2019). We excluded 6 from their sample of 62 papers: The review of the moral disengagement literature by Moore (2015); three proceedings abstracts (Astrove et al. 2015; Huang and Yan 2014; Pryor et al. 2015), because manuscripts were not received by the authors; Fooks et al. (2013), which did not contain the search term “moral disengagement”; and the auto-ethnographic account by Kempster and Gregory (2017). We recorded how papers explicitly conceptualized moral disengagement. In addition, we assessed whether moral disengagement was conceptualized or studied as an independent, dependent, mediator, or moderator variable. On this basis, we classified variables as either process moral disengagement (state) or propensity to morally disengage (trait): If moral disengagement was specified as a mediator, we classified the variable as process moral disengagement; if moral disengagement was specified as a moderator, we classified the variable as propensity to morally disengage; if moral disengagement was studied as an independent or dependent variable, we classified the variable as either process moral disengagement or propensity to morally disengage, depending on the broader study context or the paper’s conceptualization of moral disengagement. We recorded the study method (conceptual, qualitative, cross-sectional, experimental) on a paper level or – in the case of different methods across studies – on a study level. In addition, we recorded the measures used in order to determine whether scholars measured moral disengagement as a process (state) or propensity (trait). We leveraged the analysis of moral disengagement measures in Newman et al. (2019), who identified measures by Bandura et al. (1996) as state-like, and the measures by Detert et al. (2008), McFerran et al. (2010), and Moore et al. (2012) as “trait-like.” In the case of experimental studies, however, these measures would be recorded as state-like. Last, we concluded whether a paper consistently conceptualized and operationalized moral disengagement as process, as propensity, or whether the two constructs were inconsistently invoked, rendering the study ambiguous.

**Table 1** Overview of conceptualization, variable type, operationalization of the review sample of Newman et al. (2019)

| Paper               |      |                                  |                                                                                                                                                                                                                                                                               | Moral disengagement conceptualization |                        |                         | Variable Type |                                                                      | Moral disengagement operationalization |                 |  |
|---------------------|------|----------------------------------|-------------------------------------------------------------------------------------------------------------------------------------------------------------------------------------------------------------------------------------------------------------------------------|---------------------------------------|------------------------|-------------------------|---------------|----------------------------------------------------------------------|----------------------------------------|-----------------|--|
| Author              | Year | Study Method No.                 | Moral disengagement definition                                                                                                                                                                                                                                                | Class                                 | Structure <sup>a</sup> | MD variable type        | Class         | Moral disengagement measure                                          | Measure type                           | Literature type |  |
| Alnuaimi et al.     | 2010 | Experimental                     | cognitive mechanisms that enable otherwise considerate people to perform self-serving activities that have detrimental social effects                                                                                                                                         | Process                               | B3                     | Mediator                | Process       | Self developed                                                       | State                                  | Process         |  |
| Baron et al.        | 2015 | Cross-sectional                  | a cognitive process that deactivates moral self-regulation, thus enabling individuals to behave in ways inconsistent with their own values                                                                                                                                    | Process                               | B8                     | Mediator                | Process       | Detert et al. (2008)                                                 | Trait                                  | ambiguous       |  |
| Barsky              | 2011 | Cross-sectional                  | cognitive mechanisms to disengage moral self-sanctions as a means of allowing self to act in deviant ways                                                                                                                                                                     | Process                               | B2                     | Independent             | Process       | Self-developed                                                       | State                                  | Process         |  |
| Beaudoin et al.     | 2015 | Experimental                     | an individual cognitive orientation that significantly affects unethical behavior                                                                                                                                                                                             | Propensity                            | B8                     | Mediator                | Process       | Moore et al. (2012)                                                  | Trait                                  | ambiguous       |  |
| Beu and Buckley     | 2004 | Conceptual                       | self-sanctions do not affect conduct unless they are activated and the process of moral disengagement prevents this activation                                                                                                                                                | Process                               | B8                     |                         | n/a           |                                                                      | n/a                                    | Process         |  |
| Bonner et al.       | 2016 | Cross-sectional                  | supervisor and employee moral disengagement as individual traits                                                                                                                                                                                                              | Propensity                            | B8                     | Independent / Moderator | Propensity    | Moore et al. (2012) adapted to context of work                       | Trait                                  | Propensity      |  |
| Chen et al.         | 2016 | Cross-sectional                  | a set of cognitive justification mechanisms that allow an individual to commit unethical acts while disengaging from the moral norms and self-sanctions that ordinarily inhibit such acts                                                                                     | Process                               | B8                     | Mediator                | Process       | Moore et al. (2012)                                                  | Trait                                  | ambiguous       |  |
| Christian and Ellis | 2014 | Cross-sectional                  | individuals exhibit dispositional differences in the expression of moral disengagement (trait instantiation of moral disengagement)                                                                                                                                           | Propensity                            | B8                     | Independent             | Propensity    | 20 items from Detert et al. (2008)                                   | Trait                                  | Propensity      |  |
| Chugh et al.        | 2014 | Experimental                     | individual difference that is also sometimes referred to as the propensity to morally disengage                                                                                                                                                                               | Propensity                            | B8                     | Dependent               | Propensity    | Detert et al. (2008)                                                 | Trait                                  | Propensity      |  |
| Claybourn           | 2011 | Cross-sectional                  | cognitive processes involved in the prevention or circumvention of moral decision-making and moral behavior                                                                                                                                                                   | Process                               | B8                     | Dependent               | Process       | Bandura et al. (1996), adapted to work context                       | State                                  | Process         |  |
| Cohen et al.        | 2014 | Cross-sectional                  | moral disengagement as individual difference / trait                                                                                                                                                                                                                          | Propensity                            | B8                     | Independent             | Propensity    | Moore et al. (2012)                                                  | Trait                                  | Propensity      |  |
| D'Arcy et al.       | 2014 | Experimental                     | state instantiation of moral disengagement, moral disengagement from information security policy violations that is triggered by security-related stress                                                                                                                      | Process                               | B8                     | Mediator                | Process       | Bandura et al. (1996) adapted for ISPV context                       | State                                  | Process         |  |
| Dang et al.         | 2017 | Experimental and cross-sectional | individual difference termed "moral disengagement propensity"                                                                                                                                                                                                                 | Propensity                            | B8                     | Moderator               | Propensity    | Moore et al. (2012)                                                  | Trait                                  | Propensity      |  |
| Detert et al.       | 2008 | Cross-sectional                  | a set of cognitive mechanisms that deactivate moral self-regulatory processes and thereby help to explain why individuals often make unethical decisions without apparent guilt or self-censure; AND: some people will be more predisposed to moral disengagement than others | Process and Propensity                | B8                     | Mediator                | Process       | Detert et al. (2008)                                                 | Trait                                  | ambiguous       |  |
| Duffy et al.        | 2012 | Cross-sectional                  | set of cognitive justifications that allow an individual to commit acts such as social undermining while avoiding the self-sanctions that ordinarily deter such behavior                                                                                                      | Process                               | B8                     | Mediator                | Process       | claims to use 15-item MD at work measure from McFerran et al. (2010) | State                                  | Process         |  |

| Paper                   |      |           |                                  | Moral disengagement conceptualization                                                                                                                                                                                        |            |                        | Variable Type                        |         | Moral disengagement operationalization                                                          |              |                 |
|-------------------------|------|-----------|----------------------------------|------------------------------------------------------------------------------------------------------------------------------------------------------------------------------------------------------------------------------|------------|------------------------|--------------------------------------|---------|-------------------------------------------------------------------------------------------------|--------------|-----------------|
| Author                  | Year | Study No. | Method                           | Moral disengagement definition                                                                                                                                                                                               | Class      | Structure <sup>a</sup> | MD variable type                     | Class   | Moral disengagement measure                                                                     | Measure type | Literature type |
| Egels-Zandén            | 2017 |           | Qualitative (case studies)       | propensity to evoke cognitions which restructure one's actions to appear less harmful, minimize one's understanding of responsibility for one's actions, or attenuate the perception of the distress one causes others       | Propensity | B8                     |                                      |         | n/a                                                                                             | n/a          | Propensity      |
| Eriksson                | 2016 |           | Conceptual                       | moral disengagement occurs when the individual is able to act in contravention of his or her morals, without feeling bad                                                                                                     | Process    | B8                     |                                      |         | n/a                                                                                             | n/a          | Process         |
| Eriksson and Svensson   | 2016 |           | Qualitative (case studies)       | the dissonance between individuals' sense of right and wrong and their actions                                                                                                                                               | Process    | B8                     |                                      |         | n/a                                                                                             | n/a          | Process         |
| Fida et al.             | 2015 |           | Cross-sectional                  | social-cognitive processes by which a wrongful, deviant, and antisocial behavior is psychologically altered such that it is dissociated from these negative qualities that would serve to deter the actor from performing it | Process    | B8                     | Mediator                             | Process | Self-developed                                                                                  | State        | Process         |
| Fida et al.             | 2018 |           | Cross-sectional                  | the set of cognitive mechanisms that alter or reframe misconduct, allowing people to engage in this                                                                                                                          | Process    | B8                     | Independent, Mediator, and Dependent | Process | Farnese et al. (2011)                                                                           | State        | Process         |
| He et al.               | 2019 |           | Cross-sectional                  | a set of cognitive justifications that enable an individual to eliminate self-deterrents to unethical behaviors while avoiding self-sanctions and the accompanying guilt                                                     | Process    | B8                     | Mediator                             | Process | Moore et al. (2012)                                                                             | Trait        | ambiguous       |
| Hiekkataipale and Lämsä | 2017 |           | Qualitative (critical incidents) | deactivation of moral self-regulation                                                                                                                                                                                        | Process    | B8                     |                                      |         | n/a                                                                                             | n/a          | Process         |
| Hinrichs et al.         | 2012 |           | Cross-sectional                  | the selective suspension of the internal self-regulatory standards people have that prevent them from committing inhumane or reprehensible acts                                                                              | Process    | B5                     | Dependent                            | Process | 5 items from Bandura et al. (1996)                                                              | State        | Process         |
| Huang et al.            | 2017 |           | Cross-sectional                  | the self-regulation process that typically inhibits behavior considered to be "wrong" can be deactivated, enabling individuals to maintain a favorable view of themselves when they contemplate or engage in deviant actions | Process    | B8                     | Mediator                             | Process | claim to use a scale published in McFerran et al. (2010)                                        | State        | Process         |
| Hystad et al.           | 2014 |           | Cross-sectional                  | a flexible property of the individual that results from the interplay between the individual and the environment or social context that he or she operates in, rather than resulting from innate dispositions                | Process    | B2                     | Mediator                             | Process | Eight modified items from Bandura et al. (1996)                                                 | State        | Process         |
| Johnson and Buckley     | 2015 |           | Conceptual                       | mechanisms through which moral self-sanctions are selectively activated and disengaged from detrimental behavior at different points in the self-regulatory process                                                          | Process    | B8                     |                                      |         | n/a                                                                                             | n/a          | Process         |
| Keem et al.             | 2018 | 1         | Cross-sectional                  | individuals behave according to their moral standards to avoid self-sanctions, but not when moral disengagement interrupts the link between unethical behavior and self-retributions                                         | Process    | B8                     | Mediator                             | Process | Moore et al. (2012)                                                                             | Trait        | ambiguous       |
|                         |      | 2         |                                  |                                                                                                                                                                                                                              |            |                        |                                      |         | Self-developed 8-item scale based on Bandura et al. (1996); items modified to vignette scenario | State        | Process         |

| Paper                    |      |           |                                  | Moral disengagement conceptualization                                                                                                                                                                                                  |            |                        | Variable Type    |            | Moral disengagement operationalization                                                                          |              |            |
|--------------------------|------|-----------|----------------------------------|----------------------------------------------------------------------------------------------------------------------------------------------------------------------------------------------------------------------------------------|------------|------------------------|------------------|------------|-----------------------------------------------------------------------------------------------------------------|--------------|------------|
| Author                   | Year | Study No. | Method                           | Moral disengagement definition                                                                                                                                                                                                         | Class      | Structure <sup>a</sup> | MD variable type | Class      | Moral disengagement measure                                                                                     | Measure type | Literature |
| Kennedy et al.           | 2017 |           | Cross-sectional                  | an inter-related set of cognitive rationalizations that allow people to violate their ethical standards without feeling guilty or critical of themselves                                                                               | Process    | B8                     | Mediator         | Process    | Bandura et al. (1996) adapted to the negotiation context                                                        | State        | Process    |
| Kish-Gephart et al.      | 2014 |           | Cross-sectional                  | cognitive mechanisms that can deactivate the moral self-regulatory process, thereby preventing self-censure or guilt in the face of unethical behavior                                                                                 | Process    | B7                     | Dependent        | Process    | Coded justifications of ethically charged behavior                                                              | State        | Process    |
| Knoll et al.             | 2016 |           | Cross-sectional                  | individual differences in self-related processes associated with moral disengagement                                                                                                                                                   | Propensity | B8                     | Mediator         | Process    | Moore et al. (2012)                                                                                             | Trait        | ambiguous  |
| Lee et al.               | 2016 |           | Cross-sectional                  | contextually triggered moral justification in which individuals rationalize their norm violations                                                                                                                                      | Process    | B8                     | Mediator         | Process    | Moore et al. (2012)                                                                                             | Trait        | ambiguous  |
| Lee et al.               | 2019 | 2         | Cross-sectional                  | the deactivation of moral self-regulatory processes through the use of several interrelated cognitive mechanisms                                                                                                                       | Process    | B6 or B8 (unclear)     | Mediator         | Process    | 6-item scale (sic!) of Moore et al. (2012)                                                                      | Trait        | ambiguous  |
| Liu & Berry              | 2013 |           | Conceptual                       | dispositional moral disengagement                                                                                                                                                                                                      | Propensity | B8                     | Moderator        | Propensity | n/a                                                                                                             |              | Propensity |
| Loi et al.               | 2015 |           | Conceptual                       | a set of cognitive justifications or psychosocial maneuvers that deactivate people's moral self-regulation and allow them to commit acts such as abusive supervision                                                                   | Process    | B8                     | Mediator         | Process    | n/a                                                                                                             |              | Process    |
| Loyens                   | 2014 |           | (Qualitative) Ethnographic study | cognitive mechanisms used by individuals to reframe their behavior in ways that downplay their ethical content or moral implications                                                                                                   | Process    | B5                     |                  | n/a        | n/a                                                                                                             |              | Process    |
| Martin et al.            | 2014 |           | Conceptual                       | the cognitive capability to rationalize inconsistencies in espoused moral beliefs and behavior in practice                                                                                                                             | Process    | B8                     |                  | n/a        | n/a                                                                                                             |              | Process    |
| McFerran, Aquino & Duffy | 2010 |           | Cross-sectional                  | the willingness to engage in cognitive rationalizations that can allow people to override moral self-sanctions against acting unethically / a more general tendency to use mechanisms of disengagement                                 | Propensity | B8                     | Dependent        | Propensity | 15 items from unpublished paper by Duffy and colleagues                                                         | Trait        | Propensity |
| Moore                    | 2008 |           | Conceptual                       | an individual predisposition to evoke cognitions that allow individuals to restructure their actions to appear less harmful, minimize their role in the outcomes of their actions, or attenuate the distress that they cause to others | Propensity | B8                     | Independent      | Propensity | n/a                                                                                                             |              | Propensity |
| Moore et al.             | 2012 |           | Cross-sectional                  | propensity to morally disengage, an individual difference that represents a generalized cognitive orientation to the world                                                                                                             | Propensity | B8                     | Independent      | Propensity | Moore et al. (2012)                                                                                             | Trait        | Propensity |
| Moore et al.             | 2019 | 1         | Cross-sectional                  | individual's propensity to morally disengage; the extent to which individuals agree with statements that reflect morally disengaged thinking                                                                                           | Propensity | B8                     | Mediator         | Process    | Moore et al. (2012), prefixed with stem "at work"                                                               | Trait        | ambiguous  |
|                          |      | 2         | Experimental                     | in-the-moment morally disengaged cognitions, not dispositional moral disengagement                                                                                                                                                     | Process    | B4                     | Mediator         | Process    | set of four items designed to measure temporally activated moral disengagement adapted from Moore et al. (2012) | State (exp)  | Process    |

| Paper                 |      |           |                 | Moral disengagement conceptualization                                                                                                                                                                                                       |                                                                                            |                        | Variable Type    |            | Moral disengagement operationalization                           |                     |                 |
|-----------------------|------|-----------|-----------------|---------------------------------------------------------------------------------------------------------------------------------------------------------------------------------------------------------------------------------------------|--------------------------------------------------------------------------------------------|------------------------|------------------|------------|------------------------------------------------------------------|---------------------|-----------------|
| Author                | Year | Study No. | Method          | Moral disengagement definition                                                                                                                                                                                                              | Class                                                                                      | Structure <sup>a</sup> | MD variable type | Class      | Moral disengagement measure                                      | Measure type        | Literature type |
|                       |      | 3         | Cross-sectional | not specified                                                                                                                                                                                                                               |                                                                                            | B4                     | Mediator         | Process    | 4 items from Bandura et al (1996), adapted to work context       | State               | Process         |
|                       |      | 4         | Cross-sectional | not specified                                                                                                                                                                                                                               |                                                                                            | B8                     | Mediator         | Process    | Moore et al. (2012), prefixed with stem "at work"                | Trait               | ambiguous       |
| Nguyen                | 2015 | 1         | Cross-sectional | individual differences in moral disengagement                                                                                                                                                                                               | Propensity                                                                                 | B8                     | Moderator        | Propensity | Detert et al. (2008)                                             | Trait               | Propensity      |
|                       |      | 2         | Cross-sectional |                                                                                                                                                                                                                                             | Propensity                                                                                 | B8                     | Moderator        | Propensity | Moore et al. (2008)                                              | Trait               |                 |
| Niven & Healy         | 2016 |           | Experimental    | individual differences in moral justification                                                                                                                                                                                               | Propensity                                                                                 | B1                     | Moderator        | Propensity | 4 items from Barsky (2011)                                       | Trait               | Propensity      |
| Ntayi et al.          | 2010 |           | Cross-sectional | process of convincing the self that ethical standards do not apply to oneself in a particular context                                                                                                                                       | Process                                                                                    | B8                     | Moderator        | Propensity | adapted from Bandura et al. (1996) and Hymel et al. (2005)       | State               | ambiguous       |
| Ogunfowara & Bourdage | 2014 |           | Cross-sectional | moral disengagement explains how people come to engage in detrimental conducts that are otherwise incongruent with their moral standards                                                                                                    | Process                                                                                    | B8                     | Mediator         | Process    | Detert et al. (2008)                                             | Trait               | ambiguous       |
| Ogunfowara et al.     | 2013 | 2         | Cross-sectional | propensity to morally disengage                                                                                                                                                                                                             | Propensity                                                                                 | B8                     | Mediator         | Process    | Detert et al. (2008)                                             | Trait               | ambiguous       |
| Page & Pina           | 2015 |           | Conceptual      | a cognitive process that enables people to convince themselves that moral principles do not apply to them in a particular context, thus creating a version of reality in which detrimental behavior becomes socially and morally acceptable | Process                                                                                    | B8                     |                  | n/a        | n/a                                                              |                     | Process         |
| Palmer                | 2013 |           | Experimental    | an end state achieved through the enactment of 'psychological maneuvers'                                                                                                                                                                    | Process                                                                                    | B8                     | Mediator         | Process    | 18 items from Detert et al. (2008)                               | State (exp)         | Process         |
| Pettita et al.        | 2017 |           | Cross-sectional | the process by which individuals mitigate the consequences of their own violations of moral standards                                                                                                                                       | Process                                                                                    | B6                     | Mediator         | Process    | Job safety MD scale (introduced in the paper)                    | State               | Process         |
| Reynolds et al.       | 2014 | 1, 4      | Cross-sectional | propensity to morally disengage                                                                                                                                                                                                             | Propensity                                                                                 | B8                     | Mediator         | Process    | Detert et al. (2008)                                             | Trait               | ambiguous       |
|                       |      | 2, 5      |                 | 3                                                                                                                                                                                                                                           | moral disengagement processes as they happen; moral disengagement processes <i>in situ</i> | Process                |                  |            |                                                                  | Moore et al. (2012) | Trait           |
|                       |      | 3         |                 | moral disengagement processes as they happen; moral disengagement processes <i>in situ</i>                                                                                                                                                  | Process                                                                                    |                        |                  |            | Coding of participant justifications                             | State               | Process         |
| Samnani et al.        | 2014 |           | Cross-sectional | propensity to morally disengage                                                                                                                                                                                                             | Propensity                                                                                 | B8                     | Moderator        | Propensity | Detert et al. (2008)                                             | Trait               | Propensity      |
| Stevens et al.        | 2012 |           | Cross-sectional | the ability of individuals to selectively disengage internal moral standards via eight interrelated mechanisms or justifications                                                                                                            | Process                                                                                    | B8                     | Mediator         | Process    | Items from Detert et al. (2008), adapted to the scenario context | State               | Process         |

| Paper        |      |           |                                | Moral disengagement conceptualization                                                                                                                                                                                                                                                                                                                         |                        |                        | Variable Type    |         | Moral disengagement operationalization                                                                                                                                                                           |              |            |
|--------------|------|-----------|--------------------------------|---------------------------------------------------------------------------------------------------------------------------------------------------------------------------------------------------------------------------------------------------------------------------------------------------------------------------------------------------------------|------------------------|------------------------|------------------|---------|------------------------------------------------------------------------------------------------------------------------------------------------------------------------------------------------------------------|--------------|------------|
| Author       | Year | Study No. | Method                         | Moral disengagement definition                                                                                                                                                                                                                                                                                                                                | Class                  | Structure <sup>a</sup> | MD variable type | Class   | Moral disengagement measure                                                                                                                                                                                      | Measure type | Literature |
| Tasa & Bell  | 2017 | 1,2       | Experimental                   | an individual's propensity; moral disengagement is an individual difference in the way people cognitively process decisions and behavior so as to behave unethically without feeling distress                                                                                                                                                                 | Propensity             | B8                     | Mediator         | Process | Moore et al. (2012)                                                                                                                                                                                              | Trait        | ambiguous  |
|              |      | 3         | Experimental                   | moral disengagement, as a disposition, prior to the negotiation, and as an effect of condition, after the negotiation                                                                                                                                                                                                                                         | Process and Propensity |                        | Mediator         | Process | unclear: "Moral disengagement was assessed twice, first as a dispositional variable in an online self-assessment 4 weeks prior to the experiment, and again as a state variable in the post-negotiation survey." | unclear      | ambiguous  |
| Valle et al. | 2019 | 1,2       | Experimental                   | a cognitive mechanism engaged into help individuals cope with the demands of organizational politics and formulate strategies for behavioral action                                                                                                                                                                                                           | Process                | B8                     | Mediator         | Process | Moore et al. (2012)                                                                                                                                                                                              | State (exp)  | Process    |
| Welsh et al. | 2015 | 2,3,4     | Experimental                   | a process of rationalization in which questionable conduct is justified through a cognitive misconstrual of its nature and consequences; moral disengagement as a mechanism that causally explains how reduced self-regulation increases subsequent unethical behavior; a universal phenomenon that can be contextually influenced; state moral disengagement | Process                | B2 and B4              | Mediator         | Process | 2 or 4 items from Moore et al. (2012), adapted to specifically refer to the moral disengagement regarding the task                                                                                               | State        | Process    |
| White et al. | 2009 |           | Qualitative (content analysis) | moral disengagement removes the restraint of self-censure from harmful practices                                                                                                                                                                                                                                                                              | Process                | B8                     | Dependent        | Process | Authors' Manual for Coding Modes of Moral Disengagement                                                                                                                                                          | State        | Process    |
| Zheng et al. | 2019 |           | Cross-sectional                | set of cognitive justifications that allow individuals to commit immoral acts without apparent guilt and self-sanctions                                                                                                                                                                                                                                       | Process                | B8                     | Mediator         | Process | Moore et al. (2012)                                                                                                                                                                                              | Trait        | ambiguous  |

<sup>a</sup> B8 indicates that paper refers to eight specific mechanisms of moral disengagement curated by Bandura (e.g., 1999); B1 ... B7 indicates that paper uses a subset of these mechanisms
